# Supplementary material for: Soft-templated, mesoporous Co3O4 thin films for electrocatalysis of the oxygen evolution reaction
Source: Royal Society of Chemistry journal article supplement (doi:10.1039/d3ma01054f), 2024-01-01
Supplement: d3ma01054f1.pdf [file d3ma01054f1.pdf]

## Supporting Information to

# Soft-templated, Mesoporous $\text{Co}_3\text{O}_4$ Thin Films for Electrocatalysis of the Oxygen Evolution Reaction

*Qingyang Wu<sup>†</sup>, Maximilian Mellin<sup>†</sup>, Stefan Lauterbach<sup>‡</sup>, Chuanmu Tian<sup>†</sup>, Christian Dietz<sup>§</sup>, Jan P. Hofmann<sup>†</sup>, and Marcus Einert<sup>†\*</sup>*

<sup>†</sup>Surface Science Laboratory, Department of Materials and Earth Sciences, Technical University of Darmstadt, Otto-Berndt-Strasse 3, 64287 Darmstadt, Germany;

<sup>‡</sup>Institute for Applied Geosciences, Geomaterial Science, Technical University of Darmstadt, Schnittspahnstrasse 9, 64287 Darmstadt, Germany

<sup>§</sup>Institute of Material Science, Physics of Surfaces, Technical University of Darmstadt, Peter-Gruenberg-Strasse 2, 64287 Darmstadt, Germany

### **Corresponding Author**

\*E-mail: Dr. M. Einert: [meinert@surface.tu-darmstadt.de](mailto:meinert@surface.tu-darmstadt.de)

Phone: +49 6151 16-20770

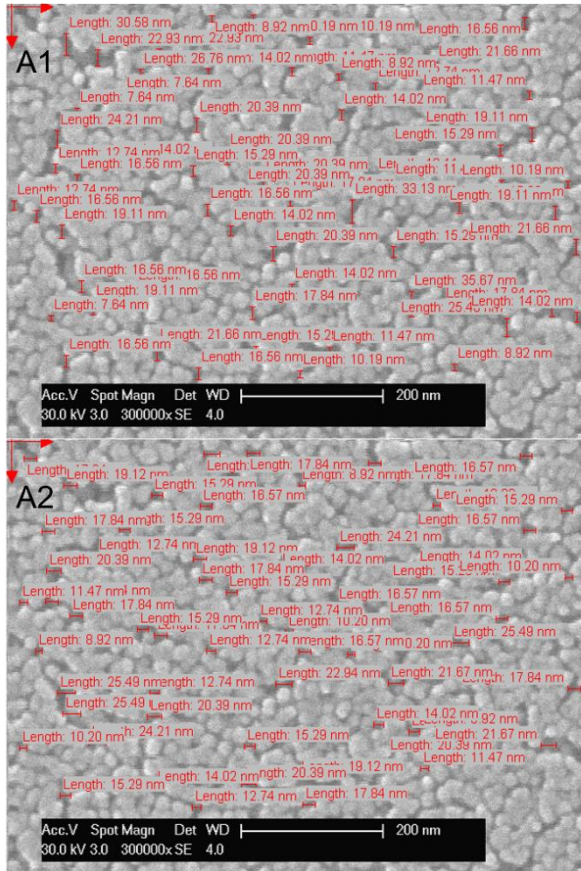

**Figure S1.** Histograms B1 and B2 of pore diameters in y- and x-direction, respectively, derived from SEM analysis A1 and A2 with Weibull distribution lines determined for a meso- $\text{Co}_3\text{O}_4$  thin film.

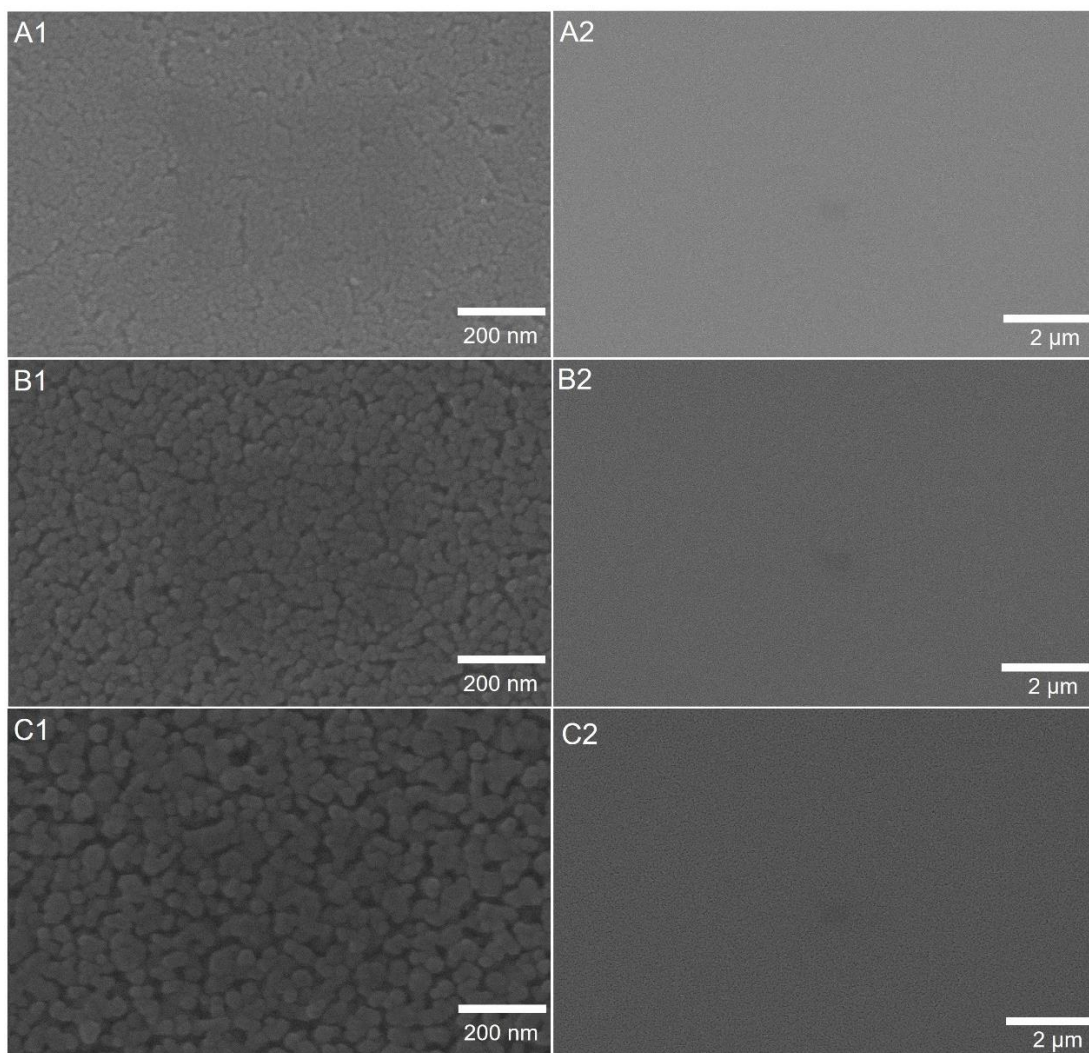

**Figure S2.** SEM images of the meso- $\text{Co}_3\text{O}_4$  thin films annealed at A 1-2) 400 °C, B 1-2) 500 °C, and C 1-2) 600 °C for 30 min in air measured at distinct magnifications.

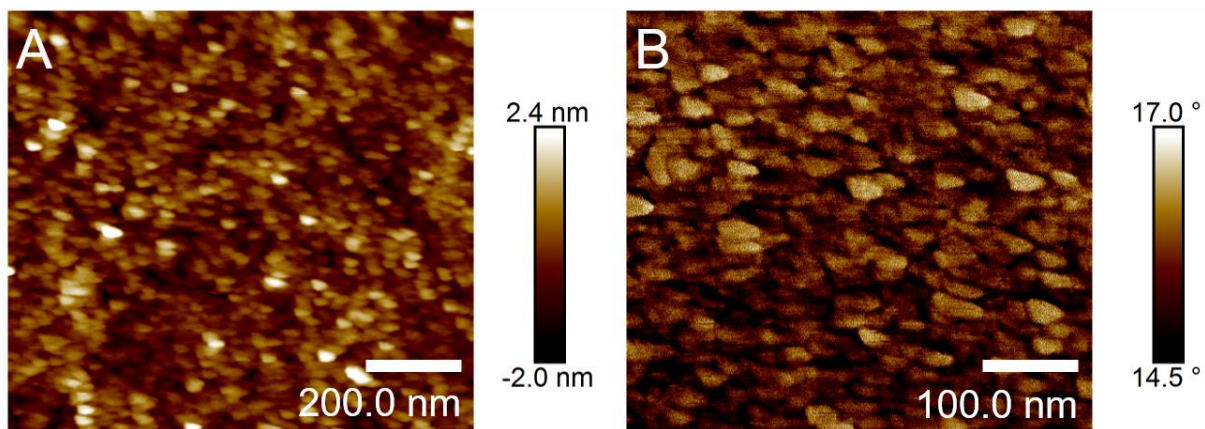

**Figure S3.** AFM analysis of the surface of the meso-Co<sub>3</sub>O<sub>4</sub> thin film sample prepared at 300 °C detected in A) topographic and B) phase-mode including a color code visualizing the height difference and the phase shift of the cantilever, respectively.

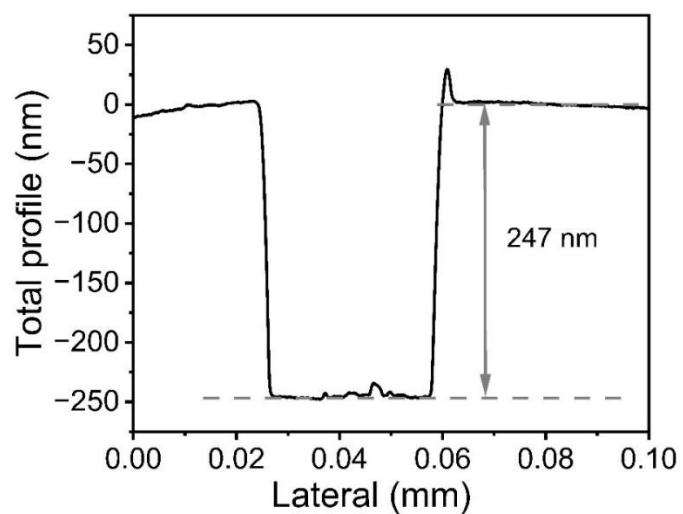

**Figure S4.** Determination of the film thickness of meso-Co<sub>3</sub>O<sub>4</sub> thin films prepared via dip-coating on a silicon substrate by profilometry.

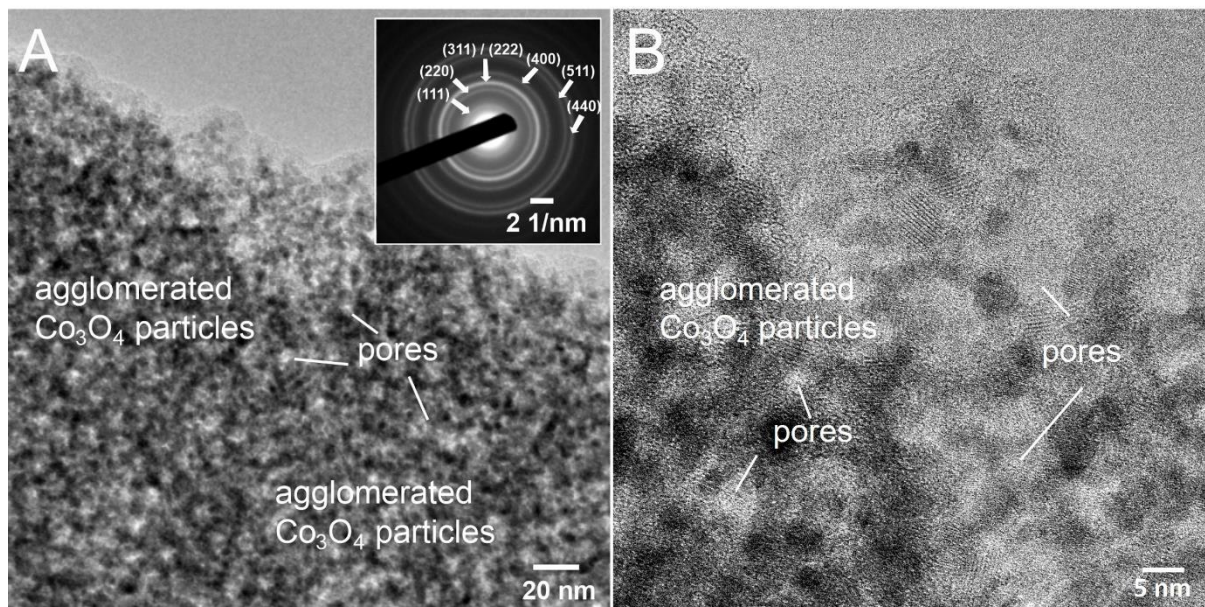

**Figure S5.** A) Bright-field TEM with inset showing SAED patterns from the bulk area, which were indexed in agreement with the cubic spinel phase. B) HR-TEM image of meso- $\text{Co}_3\text{O}_4$  demonstrating mesopores and agglomerated  $\text{Co}_3\text{O}_4$  nanoparticles.

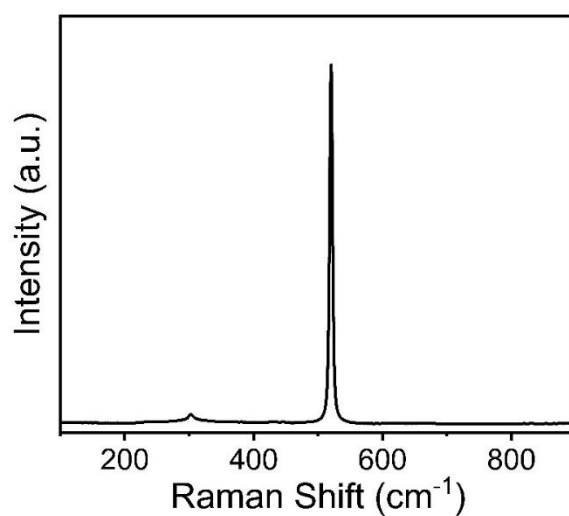

**Figure S6.** Raman spectrum of a pristine silicon substrate.

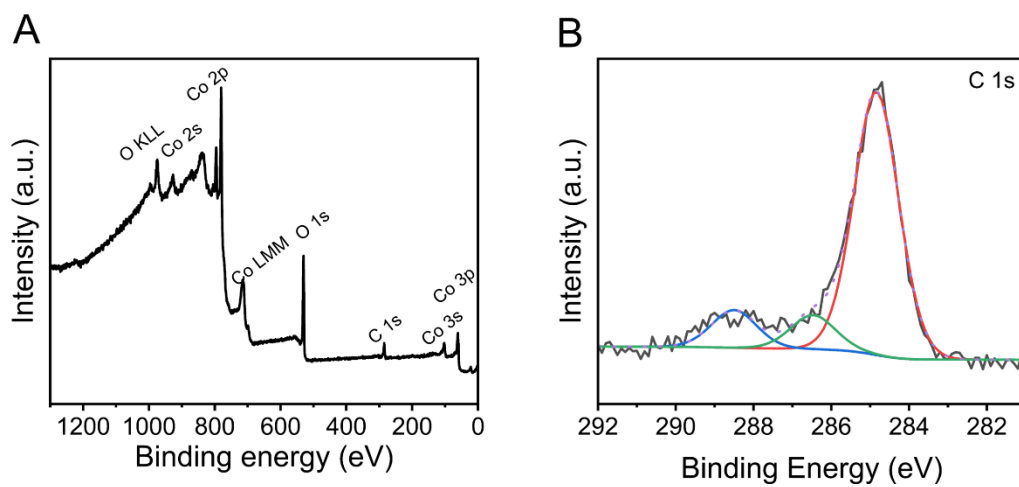

**Figure S7.** A) XPS survey spectrum and B) C 1s spectrum of meso- $\text{Co}_3\text{O}_4$  at 300 °C calcined for 30 min.

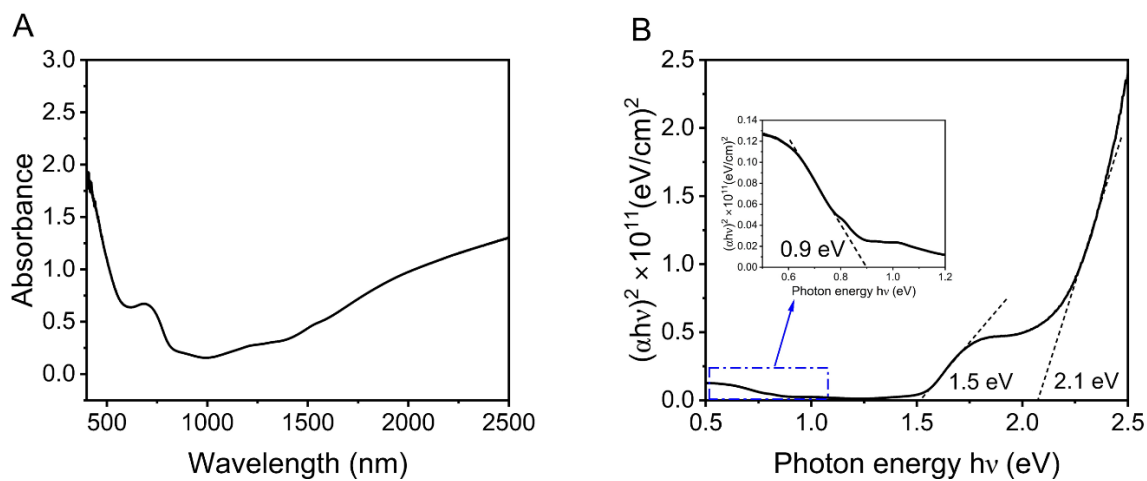

**Figure S8.** A) Absorbance spectra for the meso- $\text{Co}_3\text{O}_4$  thin film prepared at 300 °C and calcined for 30 min and B) the corresponding Tauc plots for a direct optical transition.

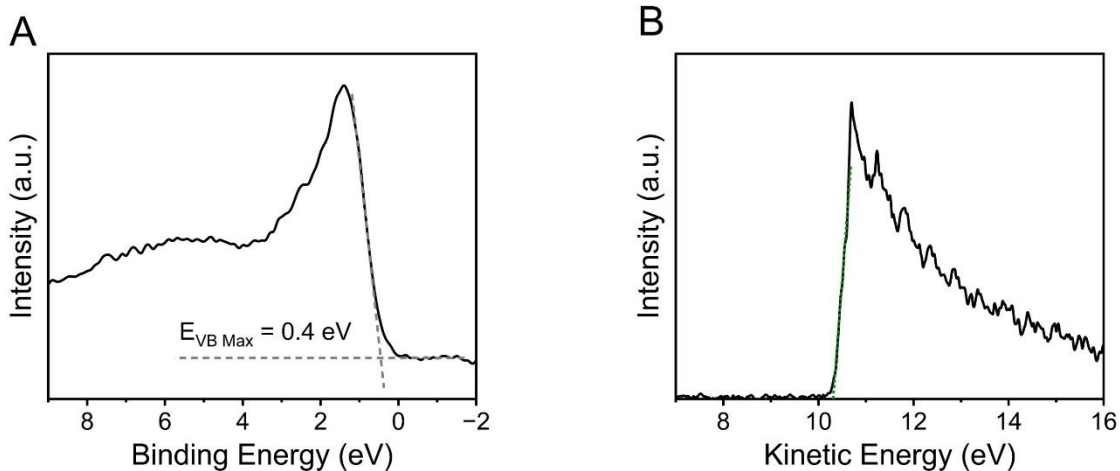

**Figure S9.** Evaluation of the A) valence band maximum by graphical linear fitting of the data for binding energies between 0 eV and 1 eV, and B) the secondary cutoff region of the XPS spectrum of meso- $\text{Co}_3\text{O}_4$ , which was collected with a photoelectron take-off angle of  $90^\circ$  and with a  $-6$  V bias applied to the sample.

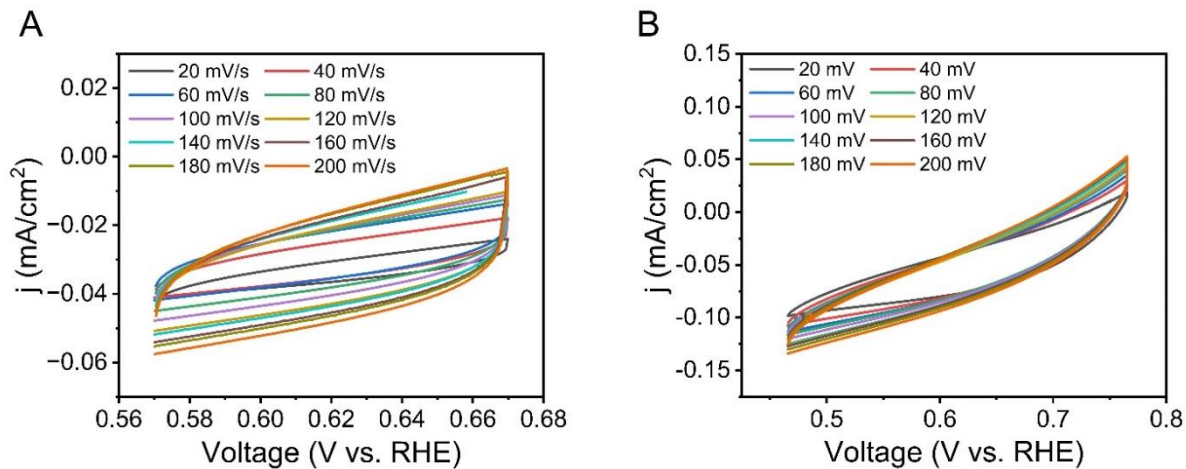

**Figure S10.** Scan rate-dependent cyclic voltammetry curves recorded for A) meso- and B) dense  $\text{Co}_3\text{O}_4$  thin films at distinct scan rates ranging from 20 mV/s to 200 mV/s.

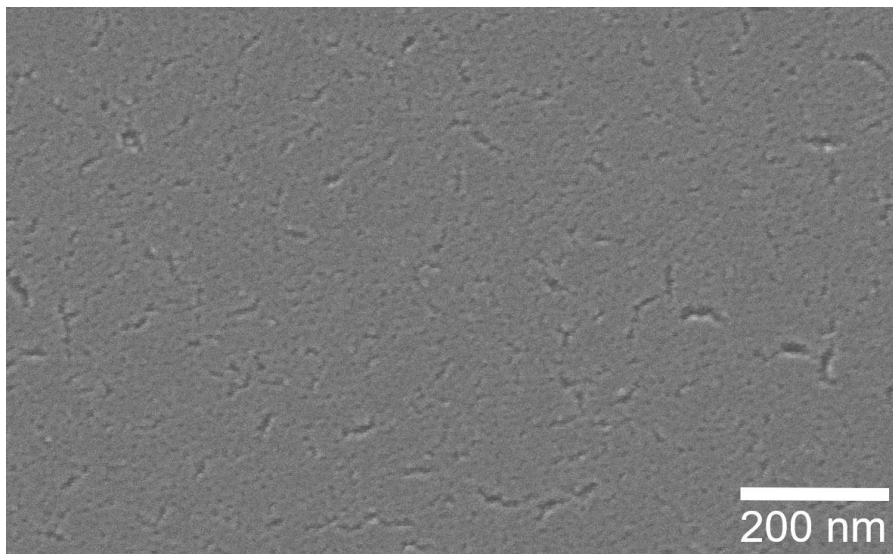

**Figure S11.** A SEM image of the meso-Co<sub>3</sub>O<sub>4</sub> thin film deposited on an FTO substrate and after electrochemical analysis (which was CV, LSV, DCV, and EIS, see experimental section of the manuscript).



**Table S1.** OER performances for nanostructured cobalt oxides investigated in alkaline solutions.

| Catalyst                                                              | Synthesis method                                                       | Electrolyte | Substrate                                                      | Over-potential ( $\eta$ ) at 10 mA/cm <sup>2</sup> (mV) | Onset potential (V vs. RHE) | Tafel slope (mV/dec) | Reference        |
|-----------------------------------------------------------------------|------------------------------------------------------------------------|-------------|----------------------------------------------------------------|---------------------------------------------------------|-----------------------------|----------------------|------------------|
| Co <sub>3</sub> O <sub>4</sub> nanosheets/nano particles/nanospheres  | Hydrothermal                                                           | 1 M KOH     | glassy carbon                                                  | 342/<br>350/<br>448                                     | 1.52/<br>1.53/<br>1.57      | 80/<br>84/<br>99     | 1                |
| Mesoporous Co <sub>3</sub> O <sub>4</sub>                             | Hard templating from KIT-6 mesoporous silica aging at 35 °C and 100 °C | 1 M KOH     | glassy carbon                                                  | 411 (at 35 mA)<br>426 (100 mA)                          | 1.45 (35)<br>1.48 (100)     | 60-70                | 2                |
| Mesoporous Co <sub>3</sub> O <sub>4</sub> nanoflakes                  | Microwave-assisted hydrothermal and low-temperature conversion         | 1 M KOH     | glass carbon                                                   | 380                                                     | 1.45                        | 48                   | 3                |
| Sub-5 nm Co <sub>3</sub> O <sub>4</sub> nanoparticles                 | Pulsed laser fragmentation in liquid (PLFL)                            | 1 M KOH     | Glass carbon                                                   | 400                                                     | 1.55                        | 52                   | 4                |
| Co <sub>3</sub> O <sub>4</sub> Nanowires                              | Thermal annealing of CoCH nanowires                                    | 1 M KOH     | Carbon fiber paper                                             | ~330                                                    | 1.5                         | 62                   | 5                |
| Cubic Co <sub>3</sub> O <sub>4</sub> nanoparticles                    | Electrodeposition                                                      | 1 M KOH     | Ni foam                                                        | 328 - 382                                               | -                           | -                    | 6                |
| Co <sub>3</sub> O <sub>4</sub> nanocrystals                           | Thermal Decomposition                                                  | 1 M KOH     | Carbon fiber papers                                            | 320                                                     | 1.52                        | 101                  | 7                |
| Co <sub>3</sub> O <sub>4</sub> nanofibers                             | electrospinning                                                        | 1 M KOH     | Fluorine doped tin oxide (FTO)                                 | 293                                                     | 1.42                        | 60.5                 | 8                |
| Two dimensional (2D) porous Co <sub>3</sub> O <sub>4</sub> nanosheets | Graphene oxide templating                                              | 1 M KOH     | Mixtures of active material, carbon black, and sodium alginate | 368                                                     | 1.48                        | 59                   | 9                |
| Co <sub>3</sub> O <sub>4</sub> nanoflowers                            | Hydrothermal                                                           | 1 M KOH     | Carbon cloth                                                   | 297                                                     | ~1.38                       | 79.1                 | 10               |
| Mesoporous Co <sub>3</sub> O <sub>4</sub>                             | Sol-gel                                                                | 0.1 M KOH   | Pyrolytic graphite (PG) carbon                                 | ~390                                                    | 1.55                        | 74.3                 | 11               |
| Co <sub>3</sub> O <sub>4</sub> catalyst                               | Sol-gel                                                                | 1 M KOH     | Pyrex glass                                                    | ~450                                                    | ~1.48                       | -                    | 12               |
| Mesoporous Co <sub>3</sub> O <sub>4</sub> thin films                  | Sol-gel, dip-coating                                                   | 1 M KOH     | FTO                                                            | 335                                                     | 1.5                         | 59                   | <b>This work</b> |

## References

- 1 S. Liu, R. Zhang, W. Lv, F. Kong and W. Wang, *Int. J. Electrochem. Sci.*, 2018, 3843–3854.
- 2 Y. J. Sa, K. Kwon, J. Y. Cheon, F. Kleitz and S. H. Joo, *J. Mater. Chem. A*, 2013, **1**, 9992.
- 3 S. Chen, Y. Zhao, B. Sun, Z. Ao, X. Xie, Y. Wei and G. Wang, *ACS Appl. Mater. Interfaces*, 2015, **7**, 3306–3313.
- 4 M. Yu, F. Waag, C. K. Chan, C. Weidenthaler, S. Barcikowski and H. Tüysüz, *ChemSusChem*, 2020, **13**, 520–528.
- 5 H. Xia, Z. Huang, C. Lv and C. Zhang, *ACS Catal.*, 2017, **7**, 8205–8213.
- 6 A. J. Esswein, M. J. McMurdo, P. N. Ross, A. T. Bell and T. D. Tilley, *J. Phys. Chem. C*, 2009, **113**, 15068–15072.
- 7 S. Du, Z. Ren, J. Zhang, J. Wu, W. Xi, J. Zhu and H. Fu, *Chem. Commun.*, 2015, **51**, 8066–8069.
- 8 A. Aljabour, *ChemistrySelect*, 2020, **5**, 7482–7487.
- 9 Z. Li, X.-Y. Yu and U. Paik, *J. Power Sources*, 2016, **310**, 41–46.
- 10 J. Du, C. Li and Q. Tang, *Electrochimica Acta*, 2020, **331**, 135456.
- 11 W. Song, Z. Ren, S.-Y. Chen, Y. Meng, S. Biswas, P. Nandi, H. A. Elsen, P.-X. Gao and S. L. Suib, *ACS Appl. Mater. Interfaces*, 2016, **8**, 20802–20813.
- 12 M. El Baydi, G. Poillerat, J.-L. Rehspringer, J. L. Gautier, J.-F. Koenig and P. Chartier, *J. Solid State Chem.*, 1994, **109**, 281–288.
